# Supplementary material
Source: publisher site journal article supplement (https://www.degruyter.com/publication/dbid/nietzsche/downloadAsset/NIETZSCHE_Nietzsche_Stand.pdf)
Supplement: Supplementary file 1 [file NIETZSCHE_Nietzsche_Stand.pdf]

## Updates

Updates include new content, revisions of existing content, enhancements, as well as corrections and fixes. Please inform us about any issues you come across.

### Update 2 / 2021 (December 2021)

#### 1 Print Publications

##### 1.1 Monographien und Texte zur Nietzscheforschung

- MTNF 75: Nicodemo, Nicola: Nietzsches Herausforderung an sich selbst und an die Menschheit. 2021.  
ISBN 978-3-11-070182-1.
- MTNF 76: Zhavoronkov, Alexey: Tradition der klassischen Philologie und philosophischer Kontext. 2021  
ISBN 978-3-11-075149-1

##### 1.2 Nietzsche-Studien. Internationales Jahrbuch für die Nietzsche-Forschung

ISSN: 0342-1422 (Print)

- Band 50: 2021.

##### 1.3 Other Publications

- Auffarth, Christoph: "Die Lust am Polemisieren: Nietzsches Unzeitgemässe Betrachtungen und Die Genealogie der Moral. Der neue Nietzsche-Kommentar (3). In: Zeitschrift für Religionswissenschaft. Band 29. Heft 1. 2021. S. 151-158. ISSN: 2194-508X.
- Kusch, Martin / Wild, Markus: "Schwerpunkt: Nietzsches genealogische Methode: Historismus, Relativismus und Anthropologie". In: Deutsche Zeitschrift für Philosophie. Band 69. Heft 1. 2021. S. 170-170. ISSN: 2192-1482.
- Riccardi, Mattia: Sommer, Andreas Urs, Kommentar zu Nietzsches Zur Genealogie der Moral. Historischer und kritischer Kommentar zu Friedrich Nietzsches Werken. Band 5/2. Hrsg. von der Heidelberger Akademie der Wissenschaften. Berlin/Boston: De Gruyter 2019, xvii + 723 pp. In: Archiv für Geschichte der Philosophie. Band 103. Heft 2. 2021. S. 369-372. ISSN: 0003-9101.
- Sorci, Antonino: "Aristotelian and/or Nietzschean narratology" Frontiers of Narrative Studies. Band 7. Heft 1. 2021. S. 62-83. ISSN: 2509-4890.
